# Supplementary material for: Immune responses against Lewis Y tumor-associated carbohydrate antigen displayed densely on self-assembling nanocarriers
Source: Royal Society of Chemistry journal article supplement (doi:10.1039/c8ob01955j), 2018-01-01
Supplement: c8ob01955j1.pdf [file c8ob01955j1.pdf]

Supplementary data

for

Induction of Effective Immune Responses against Lewis Y Tumor-Associated Carbohydrate Antigen  
by Its Densely Displaying System of the Self-Assembling Nanocarriers

Yuji Yamazaki<sup>a</sup>, Yukiko Nanbu<sup>b</sup>, Masashi Ohmae<sup>a</sup>, Manabu Sugai<sup>b</sup> and Shunsaku Kimura<sup>a\*</sup>

<sup>a</sup> Department of Material Chemistry, Graduate School of Engineering, Kyoto University, Kyoto  
Daigaku-Katsura, Nishikyo-ku, Kyoto 615-8510, Japan

<sup>b</sup> Division of Molecular Genetics, Department of Biochemistry and Bioinformative Sciences, School  
of Medicine, University of Fukui, 23-3 Matsuokashimoaizuki, Eiheiji-cho, Yoshida-gun, Fukui 910-  
1193, Japan

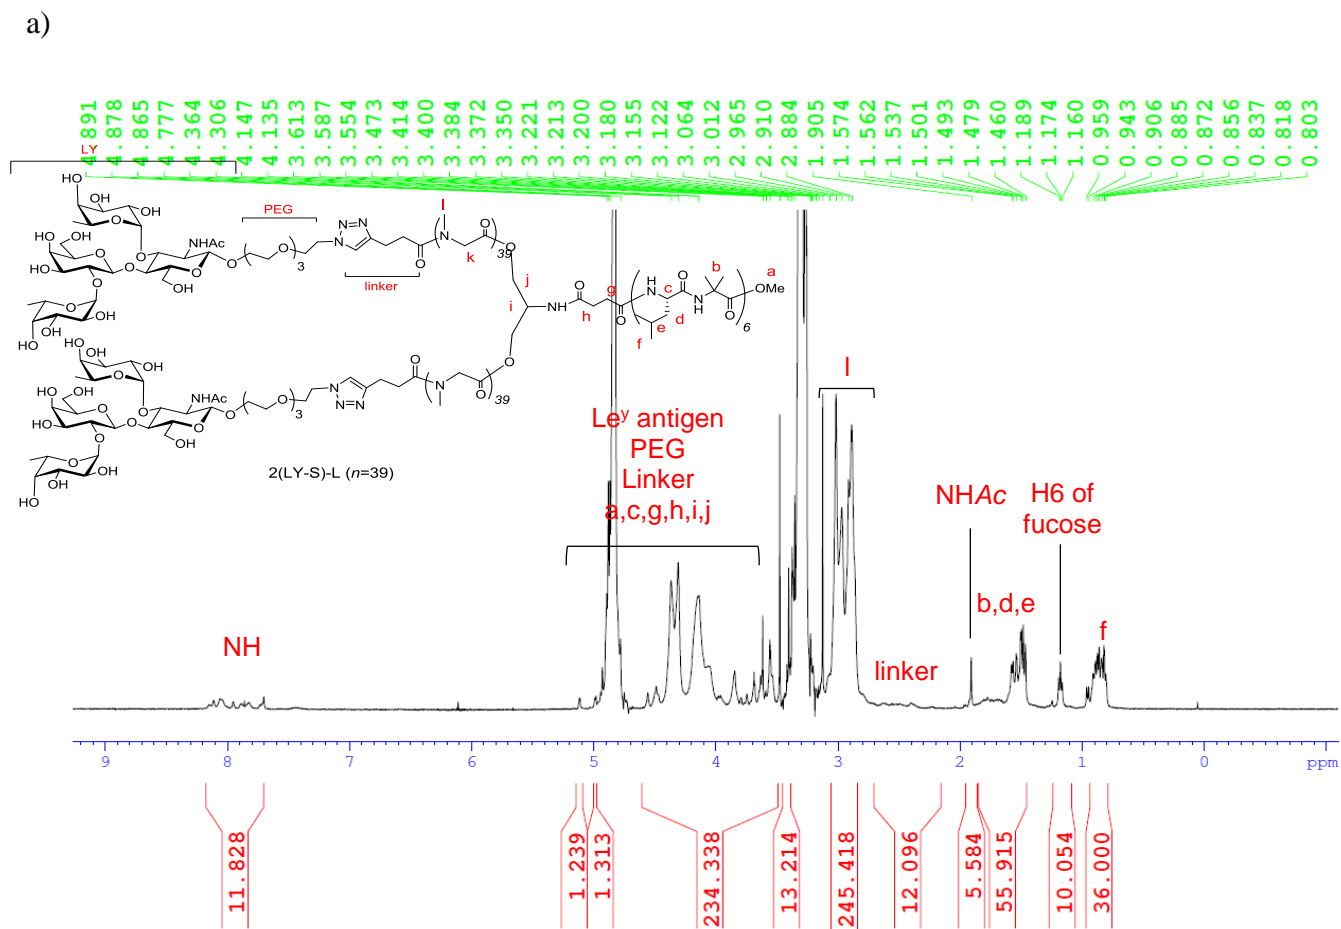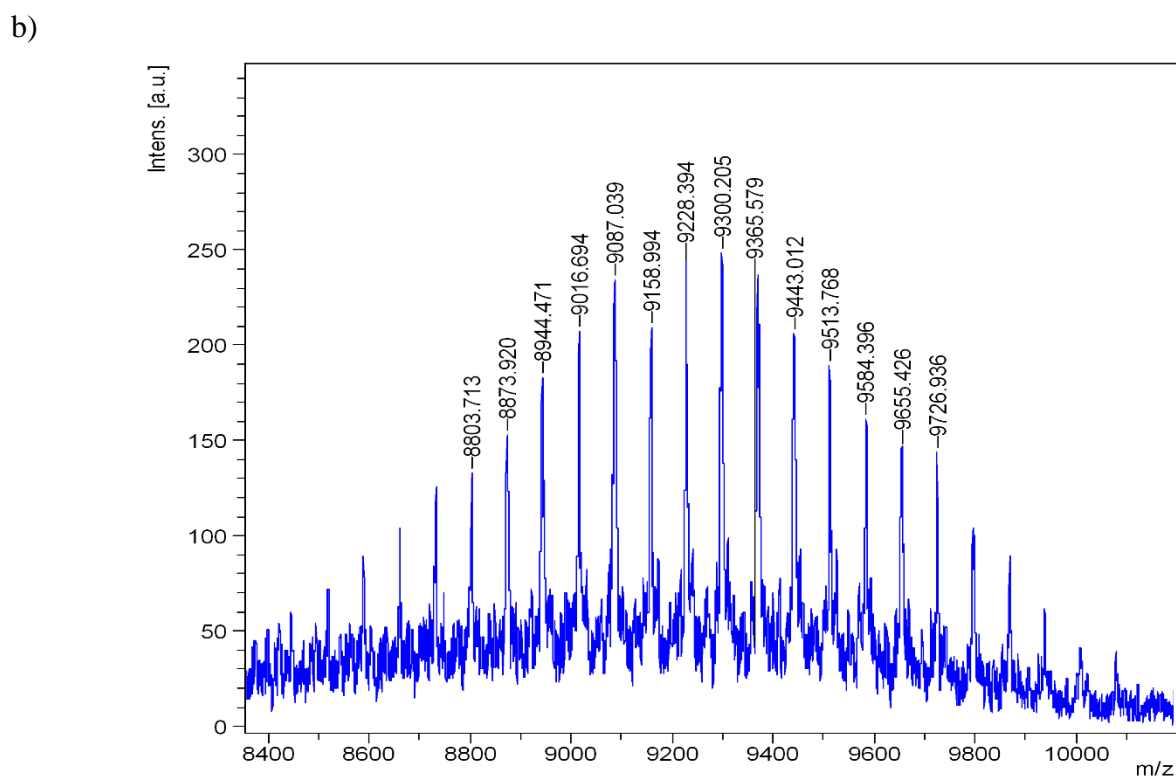

**Fig. S1** a)  $^1\text{H}$  NMR and b) MALDI-TOF mass spectra of 2(LY-S)-L.

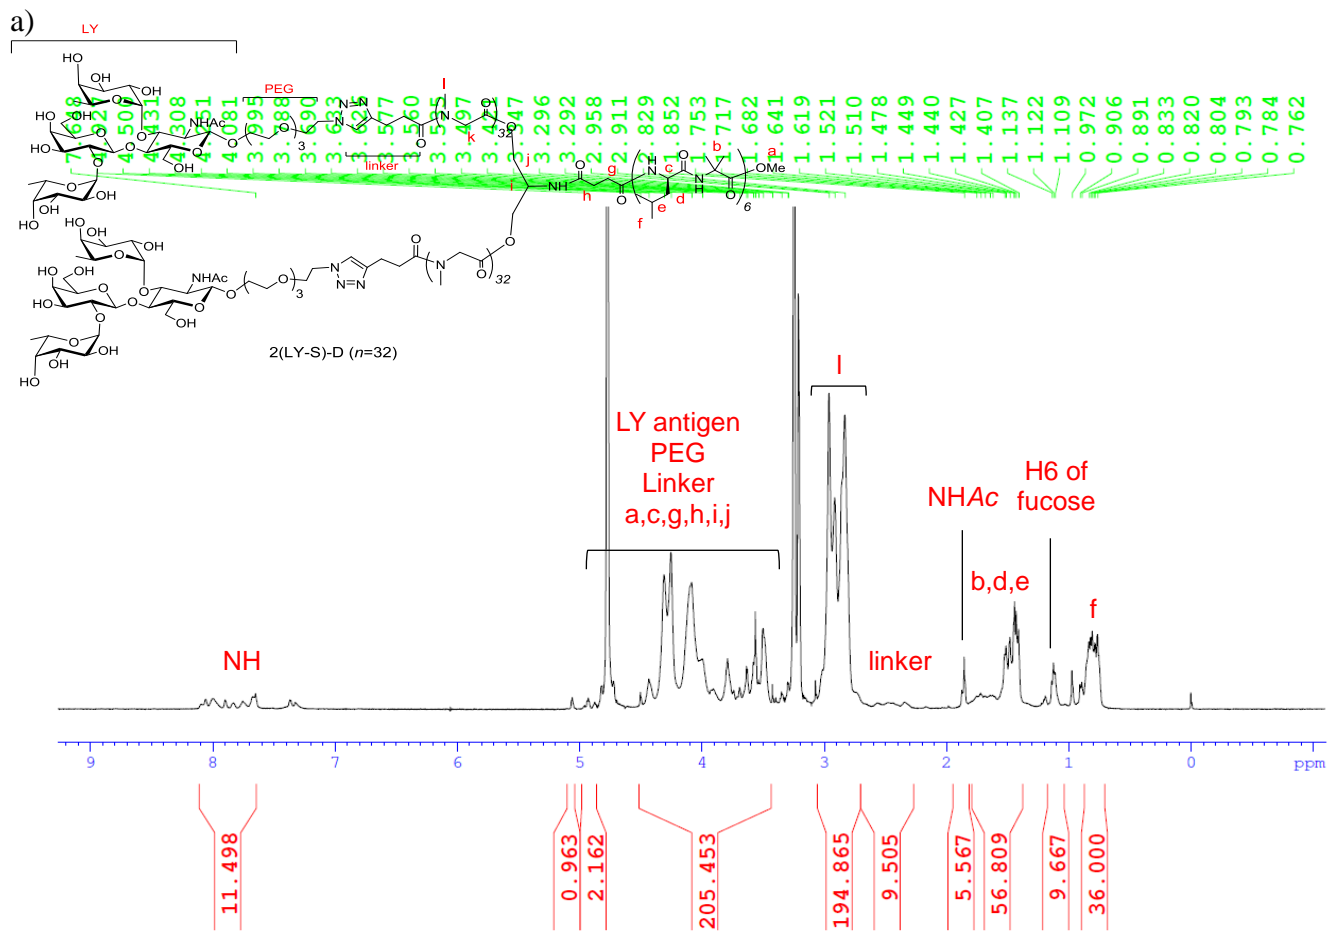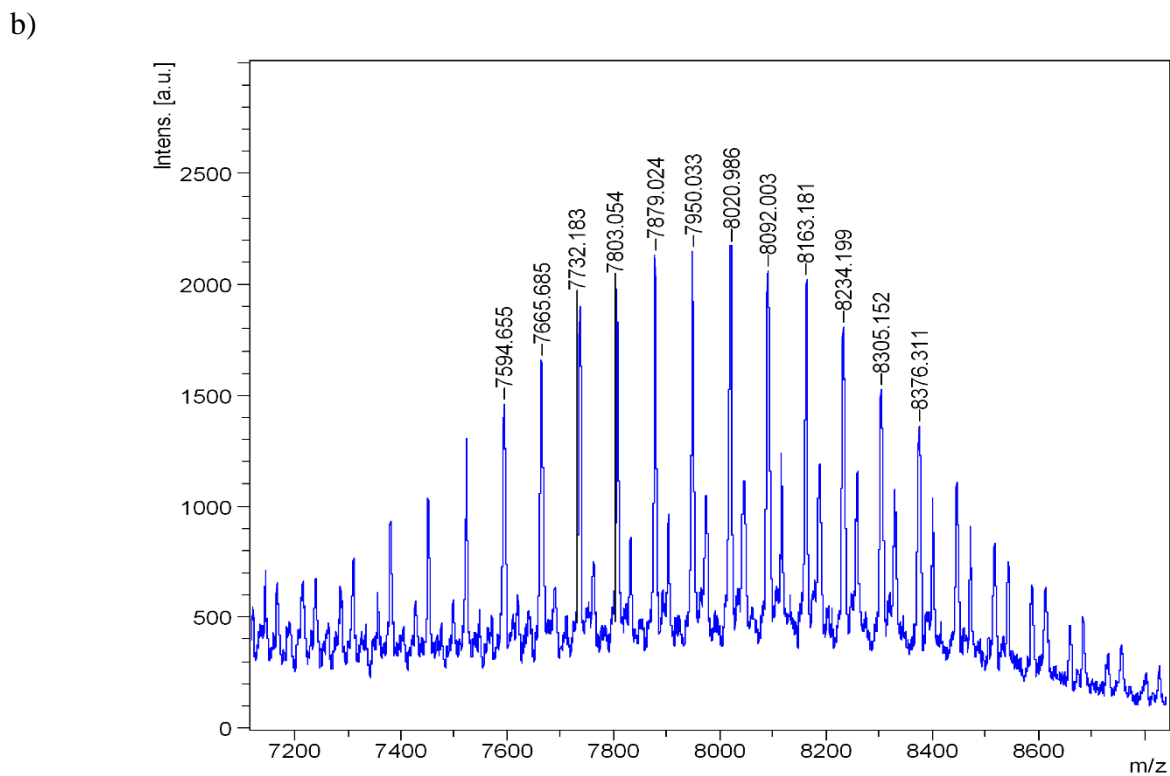

Fig. S2 a)  $^1\text{H}$  NMR and b) MALDI-TOF mass spectra of 2(LY-S)-D.

a) G0

# NANOSIGHT

control 2018-05-07 11-53-04

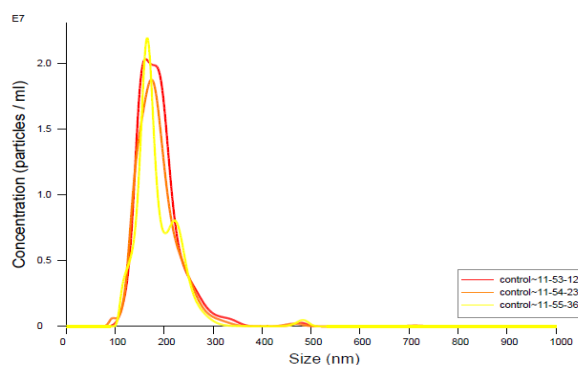

FTLA Concentration / Size graph for Experiment:  
control 2018-05-07 11-53-04

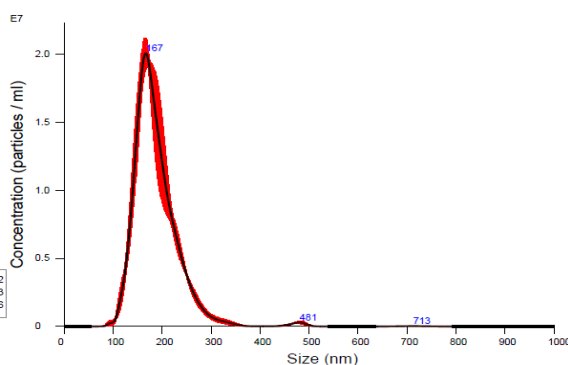

Averaged FTLA Concentration / Size for Experiment:  
control 2018-05-07 11-53-04  
Error bars indicate + / - 1 standard error of the mean

| <u>Included Files</u>                                                                                                                                                                                                                                                          | <u>Results</u>                                                                                                                                                                                                                                                                                            |
|--------------------------------------------------------------------------------------------------------------------------------------------------------------------------------------------------------------------------------------------------------------------------------|-----------------------------------------------------------------------------------------------------------------------------------------------------------------------------------------------------------------------------------------------------------------------------------------------------------|
| control 2018-05-07 11-53-12<br>control 2018-05-07 11-54-23<br>control 2018-05-07 11-55-36                                                                                                                                                                                      | Stats: Merged Data<br>Mean: 187.9 nm<br>Mode: 166.5 nm<br>SD: 49.3 nm<br>D10: 140.0 nm<br>D50: 177.8 nm<br>D90: 241.1 nm                                                                                                                                                                                  |
| <u>Details</u><br><br>NTA Version: NTA 3.2 Dev Build 3.2.16<br>Script Used: SOP Standard Measurement 11-53-04AM 07-<br>Time Captured: 11:53:04 07/05/2018<br>Operator: yamazaki<br>Pre-treatment:<br>Sample Name: control<br>Diluent: 1/200<br>Remarks:                        | Stats: Mean +/- Standard Error<br>Mean: 187.8 +/- 0.7 nm<br>Mode: 167.3 +/- 3.6 nm<br>SD: 49.4 +/- 1.8 nm<br>D10: 139.8 +/- 1.3 nm<br>D50: 177.5 +/- 1.9 nm<br>D90: 241.2 +/- 0.6 nm<br>Concentration: 1.63e+009 +/- 1.22e+008 particles/ml<br>82.7 +/- 6.2 particles/frame<br>83.5 +/- 6.0 centres/frame |
| <u>Capture Settings</u><br><br>Camera Type: sCMOS<br>Laser Type: Blue405<br>Camera Level: 13<br>Slider Shutter: 1232<br>Slider Gain: 219<br>FPS: 25.0<br>Number of Frames: 1498<br>Temperature: 22.4 °C<br>Viscosity: (Water) 0.9 cP<br>Dilution factor: Dilution not recorded |                                                                                                                                                                                                                                                                                                           |
| <u>Analysis Settings</u><br><br>Detect Threshold: 3<br>Blur Size: Auto<br>Max Jump Distance: Auto: 8.0 - 8.3 pix                                                                                                                                                               |                                                                                                                                                                                                                                                                                                           |

**Fig. S3** The data sheets obtained by nanoparticle tracking analysis (NTA) of a) G0, b) G1, c) G2, d) G3 and e) G4 using NANOSIGHT LM10.

b) G1

# NANOSIGHT

ley1-2 2018-05-07 12-07-51

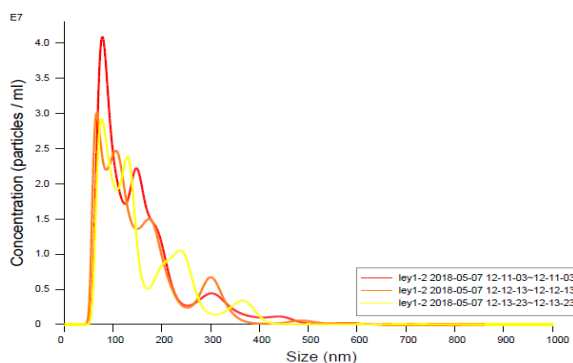

FTLA Concentration / Size graph for Experiment:  
ley1-2 2018-05-07 12-07-51

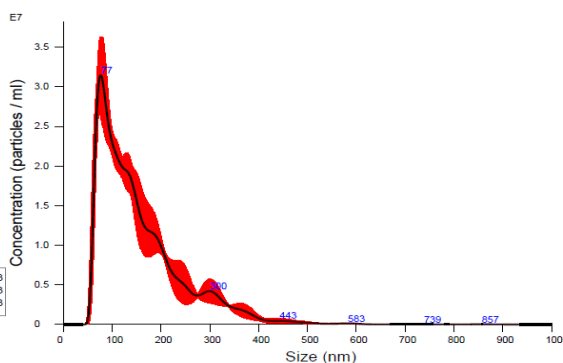

Averaged FTLA Concentration / Size for Experiment:  
ley1-2 2018-05-07 12-07-51  
Error bars indicate +/- 1 standard error of the mean

| Included Files                                                                                                                                                                                                                                                                                                                                                                                                                                                                                                                                                                                                                                                                                                                                                                                                 | Results                                                                                                                                                                                                                                                                                                                                                                                                                                                                                             |
|----------------------------------------------------------------------------------------------------------------------------------------------------------------------------------------------------------------------------------------------------------------------------------------------------------------------------------------------------------------------------------------------------------------------------------------------------------------------------------------------------------------------------------------------------------------------------------------------------------------------------------------------------------------------------------------------------------------------------------------------------------------------------------------------------------------|-----------------------------------------------------------------------------------------------------------------------------------------------------------------------------------------------------------------------------------------------------------------------------------------------------------------------------------------------------------------------------------------------------------------------------------------------------------------------------------------------------|
| <p>ley1-2 2018-05-07 12-11-03<br/>ley1-2 2018-05-07 12-12-13<br/>ley1-2 2018-05-07 12-13-23</p> <p><b>Details</b></p> <p>NTA Version: NTA 3.2 Dev Build 3.2.16<br/>Script Used: SOP Standard Measurement 12-07-51PM 07-<br/>Time Captured: 12:07:51 07/05/2018<br/>Operator: yamazaki<br/>Pre-treatment:<br/>Sample Name: ley1-2<br/>Diluent: 1/200<br/>Remarks:</p> <p><b>Capture Settings</b></p> <p>Camera Type: sCMOS<br/>Laser Type: Blue405<br/>Camera Level: 11<br/>Slider Shutter: 890<br/>Slider Gain: 146<br/>FPS: 25.0<br/>Number of Frames: 1498<br/>Temperature: 22.3 - 22.3 °C<br/>Viscosity: (Water) 0.945 - 0.947 cP<br/>Dilution factor: Dilution not recorded</p> <p><b>Analysis Settings</b></p> <p>Detect Threshold: 7<br/>Blur Size: Auto<br/>Max Jump Distance: Auto: 9.7 - 10.1 pix</p> | <p><b>Stats: Merged Data</b></p> <p>Mean: 156.3 nm<br/>Mode: 76.3 nm<br/>SD: 87.1 nm<br/>D10: 71.9 nm<br/>D50: 130.7 nm<br/>D90: 283.5 nm</p> <p><b>Stats: Mean +/- Standard Error</b></p> <p>Mean: 156.4 +/- 2.0 nm<br/>Mode: 74.1 +/- 3.7 nm<br/>SD: 86.9 +/- 1.5 nm<br/>D10: 71.7 +/- 2.2 nm<br/>D50: 130.6 +/- 1.7 nm<br/>D90: 282.0 +/- 6.0 nm</p> <p><b>Concentration:</b></p> <p>3.52e+009 +/- 1.81e+008 particles/ml<br/>178.7 +/- 9.2 particles/frame<br/>238.5 +/- 10.3 centres/frame</p> |

Fig. S3 continued.

c) G2

# NANOSIGHT

ley2-2 2018-05-07 12-23-54

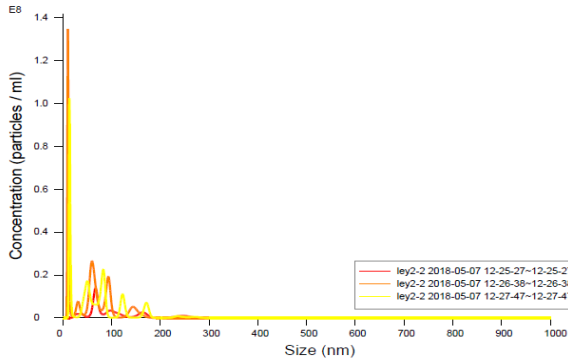

FTLA Concentration / Size graph for Experiment:  
ley2-2 2018-05-07 12-23-54

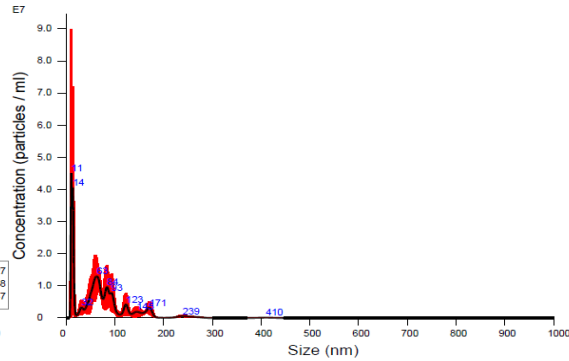

Averaged FTLA Concentration / Size for Experiment:  
ley2-2 2018-05-07 12-23-54  
Error bars indicate +/- 1 standard error of the mean

| Included Files                                                                                                                                                                                                                                                                                           | Results                                                                                                                                                                                                                                                                                                                          |
|----------------------------------------------------------------------------------------------------------------------------------------------------------------------------------------------------------------------------------------------------------------------------------------------------------|----------------------------------------------------------------------------------------------------------------------------------------------------------------------------------------------------------------------------------------------------------------------------------------------------------------------------------|
| <p>ley2-2 2018-05-07 12-25-27<br/>ley2-2 2018-05-07 12-26-38<br/>ley2-2 2018-05-07 12-27-47</p>                                                                                                                                                                                                          | <p>Stats: Merged Data<br/>Mean: 69.6 nm<br/>Mode: 10.6 nm<br/>SD: 54.4 nm<br/>D10: 10.5 nm<br/>D50: 61.9 nm<br/>D90: 143.8 nm</p>                                                                                                                                                                                                |
| <p><b>Details</b></p> <p>NTA Version: NTA 3.2 Dev Build 3.2.16<br/>Script Used: SOP Standard Measurement 12-23-54PM 07-<br/>Time Captured: 12:23:54 07/05/2018<br/>Operator: yamazaki<br/>Pre-treatment:<br/>Sample Name: ley2-2<br/>Diluent: 1/200<br/>Remarks:</p>                                     | <p>Stats: Mean +/- Standard Error<br/>Mean: 78.1 +/- 15.1 nm<br/>Mode: 30.6 +/- 18.4 nm<br/>SD: 54.8 +/- 7.4 nm<br/>D10: 24.7 +/- 13.9 nm<br/>D50: 64.9 +/- 7.6 nm<br/>D90: 153.2 +/- 28.3 nm<br/>Concentration:<br/>9.82e+008 +/- 2.75e+008 particles/ml<br/>49.9 +/- 14.0 particles/frame<br/>107.3 +/- 33.0 centres/frame</p> |
| <p><b>Capture Settings</b></p> <p>Camera Type: sCMOS<br/>Laser Type: Blue405<br/>Camera Level: 16<br/>Slider Shutter: 1300<br/>Slider Gain: 512<br/>FPS: 25.0<br/>Number of Frames: 1498<br/>Temperature: 22.4 °C<br/>Viscosity: (Water) 0.942 - 0.943 cP<br/>Dilution factor: Dilution not recorded</p> |                                                                                                                                                                                                                                                                                                                                  |
| <p><b>Analysis Settings</b></p> <p>Detect Threshold: 3<br/>Blur Size: Auto<br/>Max Jump Distance: Auto: 12.8 - 20.2 pix</p>                                                                                                                                                                              |                                                                                                                                                                                                                                                                                                                                  |

Fig. S3 continued.

d) G3

# NANOSIGHT

ley3 2018-04-10 19-20-32

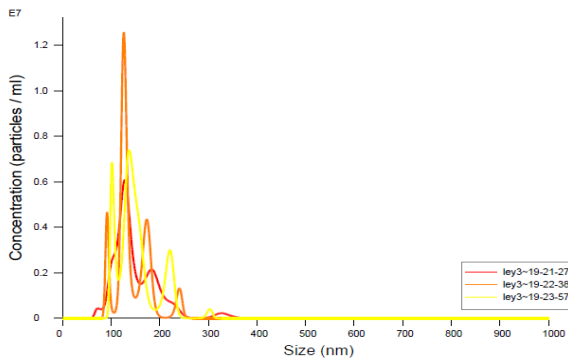

FTLA Concentration / Size graph for Experiment:  
ley3 2018-04-10 19-20-32

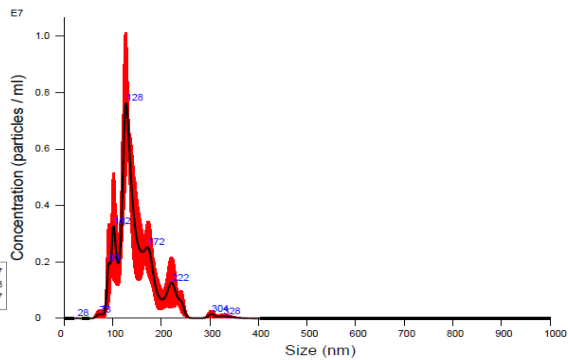

Averaged FTLA Concentration / Size for Experiment:  
ley3 2018-04-10 19-20-32  
Error bars indicate + / - 1 standard error of the mean

|                                                                                                                                                                                                                                                                                                                                                                                                                                                                                                                                                                                                                                                                                                                                                                                                                                       |                                                                                                                                                                                                                                                                                                                                                                                                                                                                                                 |
|---------------------------------------------------------------------------------------------------------------------------------------------------------------------------------------------------------------------------------------------------------------------------------------------------------------------------------------------------------------------------------------------------------------------------------------------------------------------------------------------------------------------------------------------------------------------------------------------------------------------------------------------------------------------------------------------------------------------------------------------------------------------------------------------------------------------------------------|-------------------------------------------------------------------------------------------------------------------------------------------------------------------------------------------------------------------------------------------------------------------------------------------------------------------------------------------------------------------------------------------------------------------------------------------------------------------------------------------------|
| <p><b>Included Files</b></p> <p>ley3 2018-04-10 19-21-27<br/>ley3 2018-04-10 19-22-38<br/>ley3 2018-04-10 19-23-57</p> <p><b>Details</b></p> <p>NTA Version: NTA 3.2 Dev Build 3.2.16<br/>Script Used: SOP Standard Measurement 07-20-32PM 10A-<br/>Time Captured: 19:20:32 10/04/2018<br/>Operator: yamazaki<br/>Pre-treatment:<br/>Sample Name: ley3<br/>Diluent: 1/200<br/>Remarks:</p> <p><b>Capture Settings</b></p> <p>Camera Type: sCMOS<br/>Laser Type: Blue405<br/>Camera Level: 13<br/>Slider Shutter: 1232<br/>Slider Gain: 219<br/>FPS: 25.0<br/>Number of Frames: 1498<br/>Temperature: 22.5 - 22.5 °C<br/>Viscosity: (Water) 0.941 - 0.942 cP<br/>Dilution factor: Dilution not recorded</p> <p><b>Analysis Settings</b></p> <p>Detect Threshold: 3<br/>Blur Size: Auto<br/>Max Jump Distance: Auto: 9.2 - 10.4 pix</p> | <p><b>Results</b></p> <p>Stats: Merged Data</p> <p>Mean: 148.0 nm<br/>Mode: 127.5 nm<br/>SD: 41.8 nm<br/>D10: 101.8 nm<br/>D50: 135.7 nm<br/>D90: 210.0 nm</p> <p>Stats: Mean +/- Standard Error</p> <p>Mean: 147.8 +/- 2.7 nm<br/>Mode: 130.5 +/- 3.4 nm<br/>SD: 41.3 +/- 3.4 nm<br/>D10: 100.0 +/- 2.3 nm<br/>D50: 135.3 +/- 3.5 nm<br/>D90: 201.6 +/- 10.9 nm</p> <p>Concentration: 3.85e+008 +/- 2.14e+007 particles/ml<br/>19.5 +/- 1.1 particles/frame<br/>20.8 +/- 1.1 centres/frame</p> |
|---------------------------------------------------------------------------------------------------------------------------------------------------------------------------------------------------------------------------------------------------------------------------------------------------------------------------------------------------------------------------------------------------------------------------------------------------------------------------------------------------------------------------------------------------------------------------------------------------------------------------------------------------------------------------------------------------------------------------------------------------------------------------------------------------------------------------------------|-------------------------------------------------------------------------------------------------------------------------------------------------------------------------------------------------------------------------------------------------------------------------------------------------------------------------------------------------------------------------------------------------------------------------------------------------------------------------------------------------|

Fig. S3 continued.

(e) G4

# NANOSIGHT

ley4 2018-04-10 19-04-04

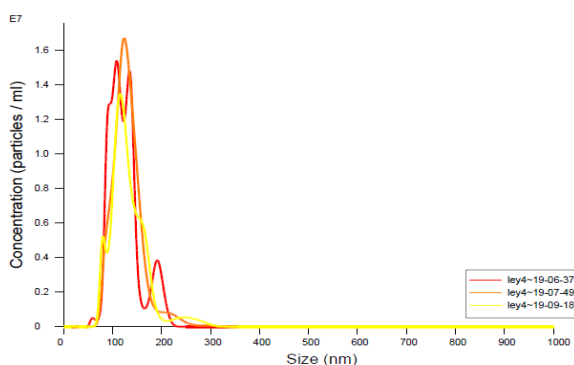

FTLA Concentration / Size graph for Experiment:  
ley4 2018-04-10 19-04-04

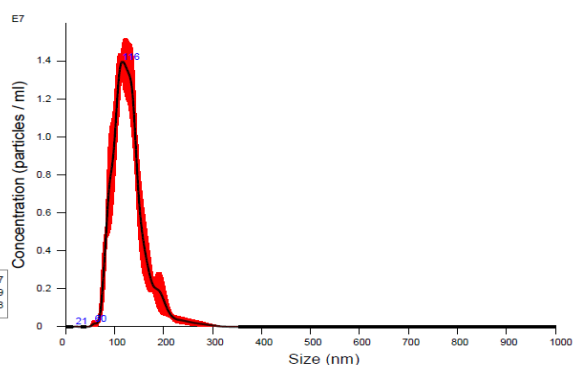

Averaged FTLA Concentration / Size for Experiment:  
ley4 2018-04-10 19-04-04  
Error bars indicate +/- 1 standard error of the mean

| <u>Included Files</u>                                                                                                                                                                                                                                                                | <u>Results</u>                                                                                                                                                                                                                                                                                           |
|--------------------------------------------------------------------------------------------------------------------------------------------------------------------------------------------------------------------------------------------------------------------------------------|----------------------------------------------------------------------------------------------------------------------------------------------------------------------------------------------------------------------------------------------------------------------------------------------------------|
| ley4 2018-04-10 19-06-37<br>ley4 2018-04-10 19-07-49<br>ley4 2018-04-10 19-09-18                                                                                                                                                                                                     | Stats: Merged Data<br>Mean: 128.7 nm<br>Mode: 115.9 nm<br>SD: 33.8 nm<br>D10: 90.6 nm<br>D50: 122.9 nm<br>D90: 169.8 nm                                                                                                                                                                                  |
| <u>Details</u><br>NTA Version: NTA 3.2 Dev Build 3.2.16<br>Script Used: SOP Standard Measurement 07-04-04PM 10A~<br>Time Captured: 19:04:04 10/04/2018<br>Operator: yamazaki<br>Pre-treatment:<br>Sample Name: ley4<br>Diluent: 1/200<br>Remarks:                                    | Stats: Mean +/- Standard Error<br>Mean: 128.9 +/- 2.3 nm<br>Mode: 116.1 +/- 4.5 nm<br>SD: 33.7 +/- 2.3 nm<br>D10: 91.0 +/- 1.5 nm<br>D50: 122.5 +/- 2.2 nm<br>D90: 170.9 +/- 4.2 nm<br>Concentration: 9.60e+008 +/- 4.60e+007 particles/ml<br>48.7 +/- 2.3 particles/frame<br>52.5 +/- 2.4 centres/frame |
| <u>Capture Settings</u><br>Camera Type: sCMOS<br>Laser Type: Blue405<br>Camera Level: 13<br>Slider Shutter: 1232<br>Slider Gain: 219<br>FPS: 25.0<br>Number of Frames: 1498<br>Temperature: 22.8 °C<br>Viscosity: (Water) 0.934 - 0.935 cP<br>Dilution factor: Dilution not recorded |                                                                                                                                                                                                                                                                                                          |
| <u>Analysis Settings</u><br>Detect Threshold: 3<br>Blur Size: Auto<br>Max Jump Distance: Auto: 9.6 - 10.3 pix                                                                                                                                                                        |                                                                                                                                                                                                                                                                                                          |

Fig. S3 continued.



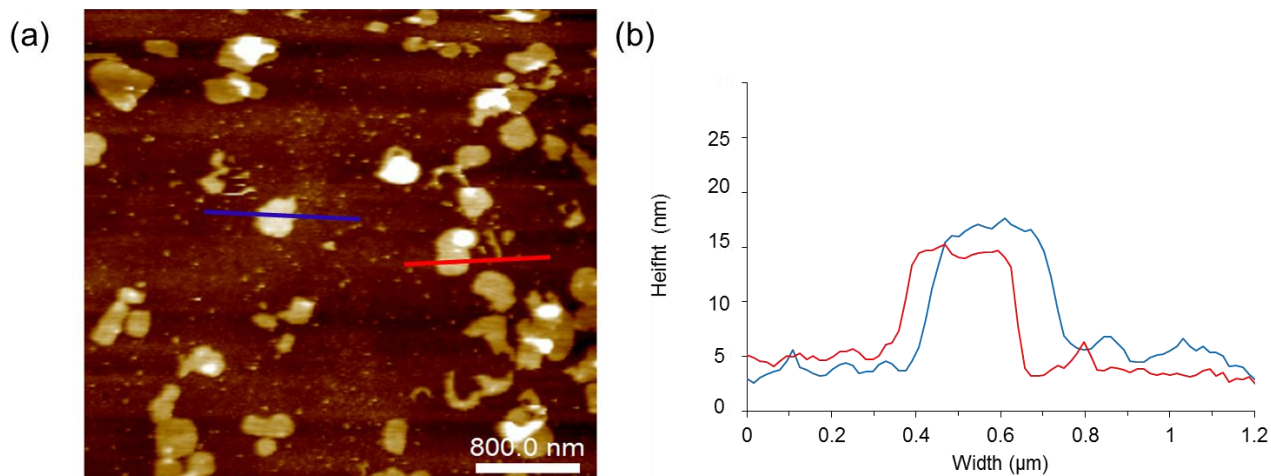

**Fig. S4** (a) The AFM image of the G0 assemblies on an APTES-modified Si-wafer in water, and (b) the height traces along the red and blue lines in (a).

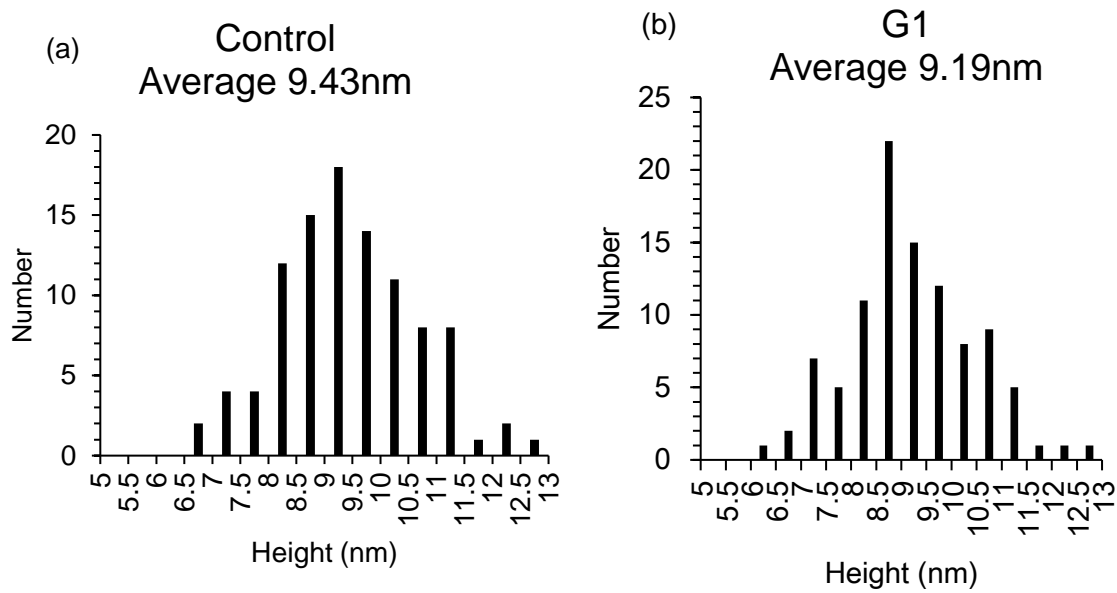

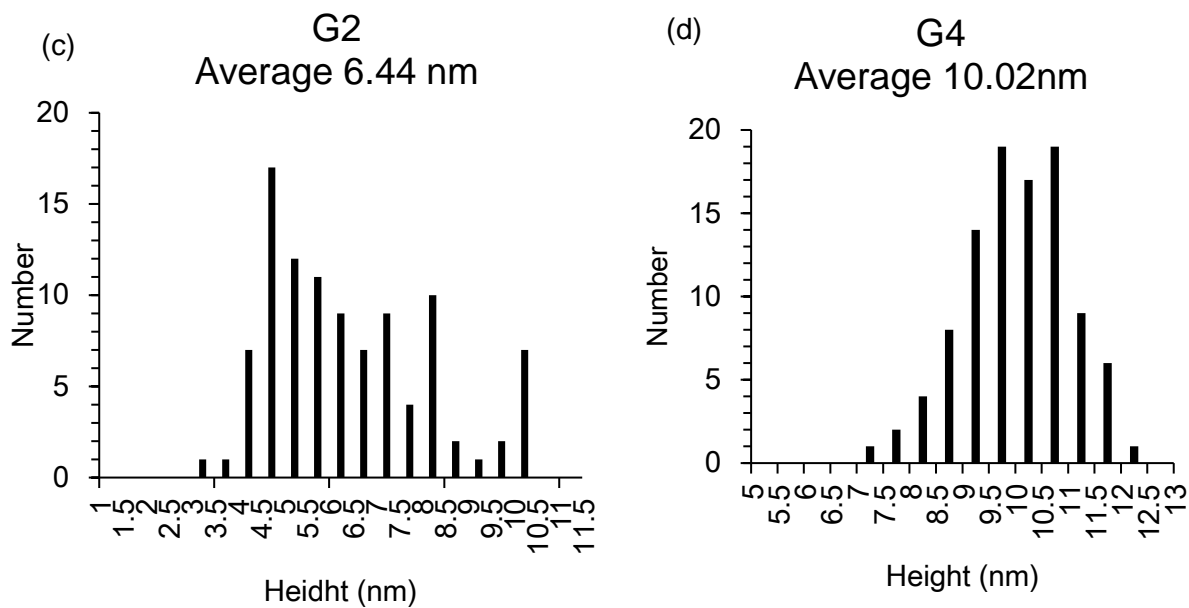

**Fig. S5** The height histograms of the assemblies (a) G0, (b) G1, (c) G2, and (d) G4 determined by the AFM measurements on an APTES-modified Si-wafer in water. n=100.

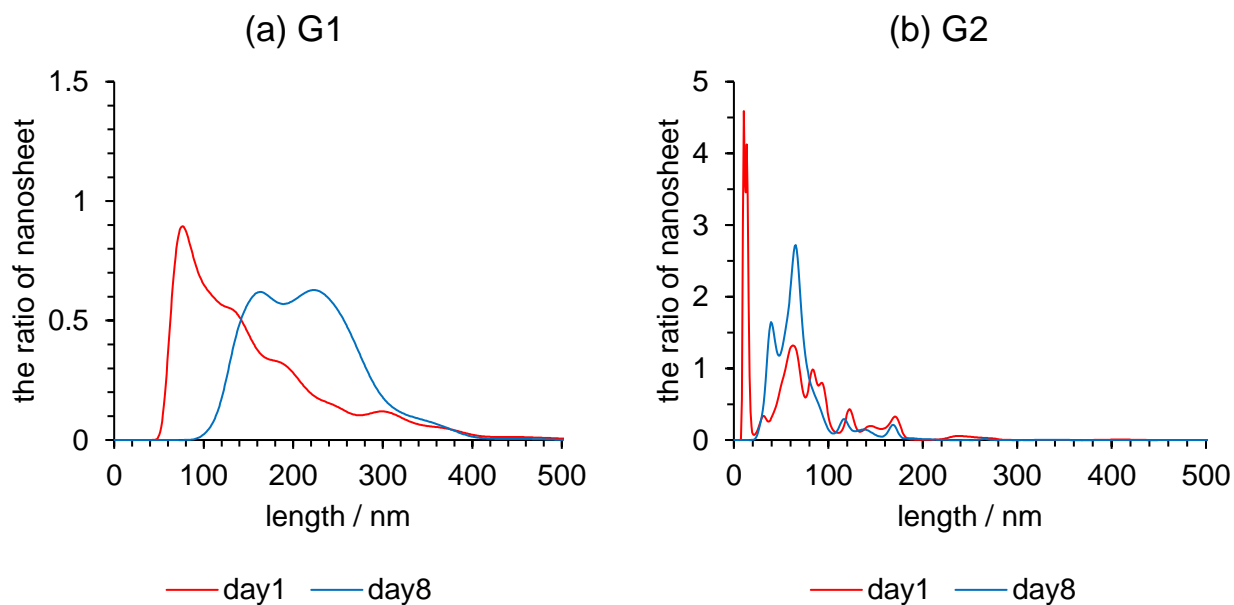

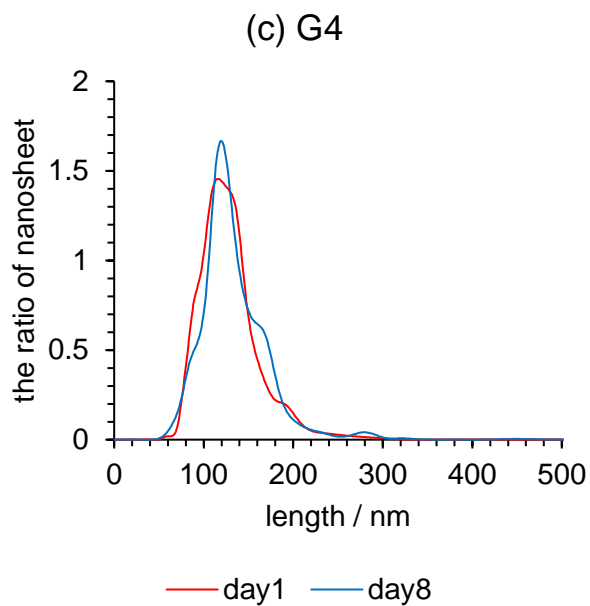

**Fig. S6** The size distribution of the assemblies of (a) G1, (b) G2, and (c) G4 at day 1 (red) and day 7 (blue) stored at 4 °C after preparation.

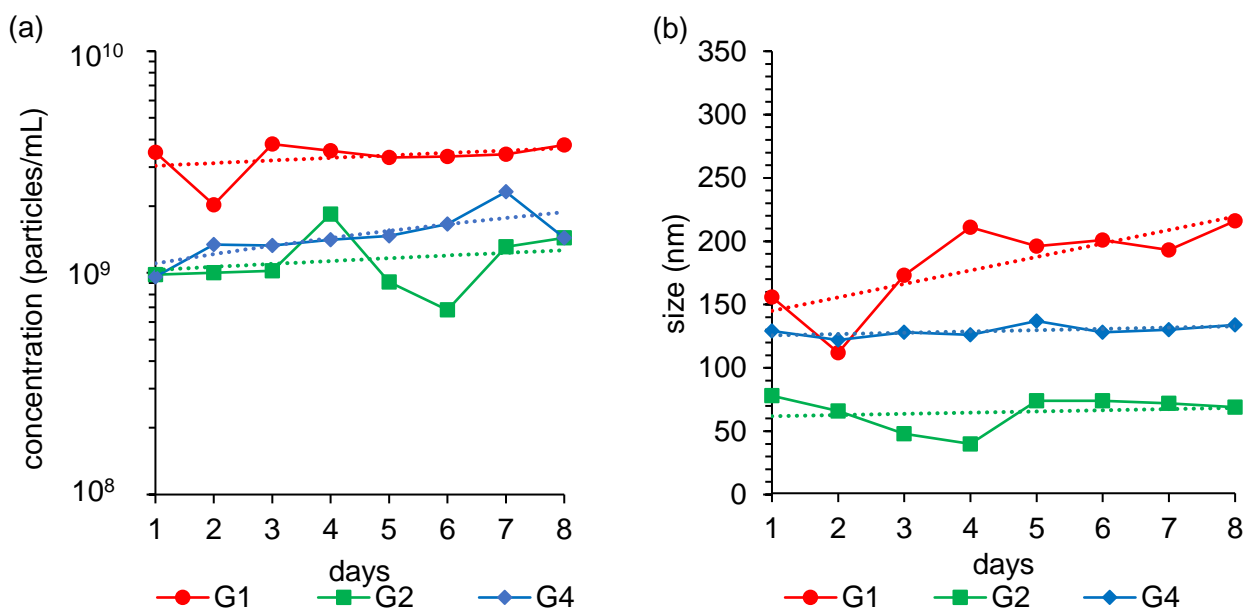

**Fig. S7** The time dependence of (a) the concentration and (b) the size of the assemblies in G1 (●), G2 (■), and G4 (▲). The colored dashed lines represent the corresponding linear approximations.

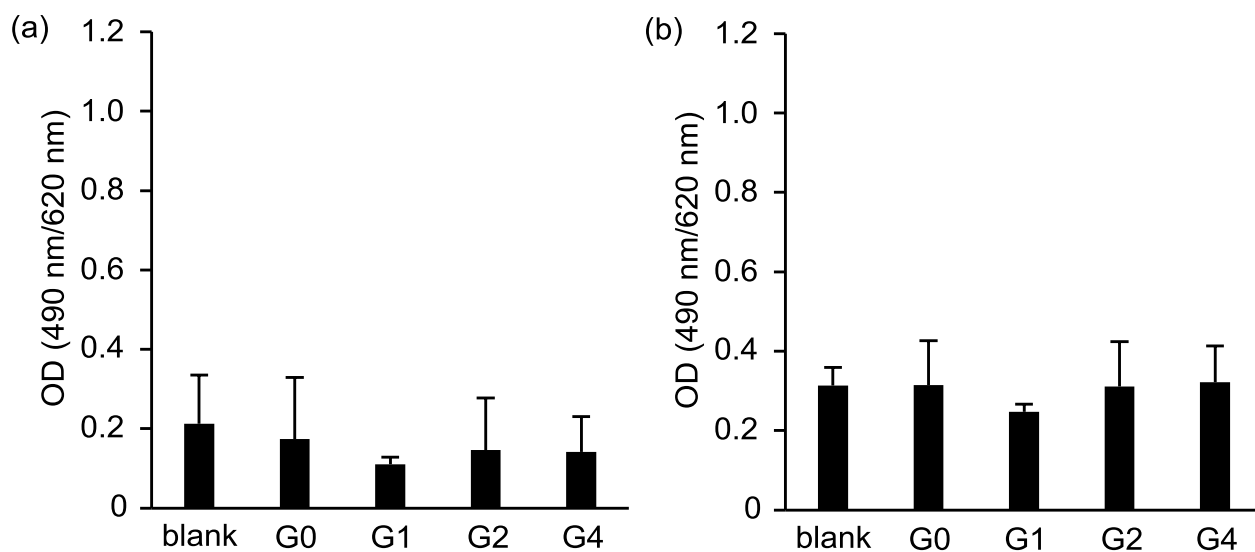

**Fig. S8** IgM amounts after the twice administrations of the assemblies (G0–G2, and G4) determined by ELISA on the plates of (a) PEG-(LLeuAib)<sub>6</sub>-OMe- and (b) Boc-(LLeuAib)<sub>6</sub>-OMe-coatings.

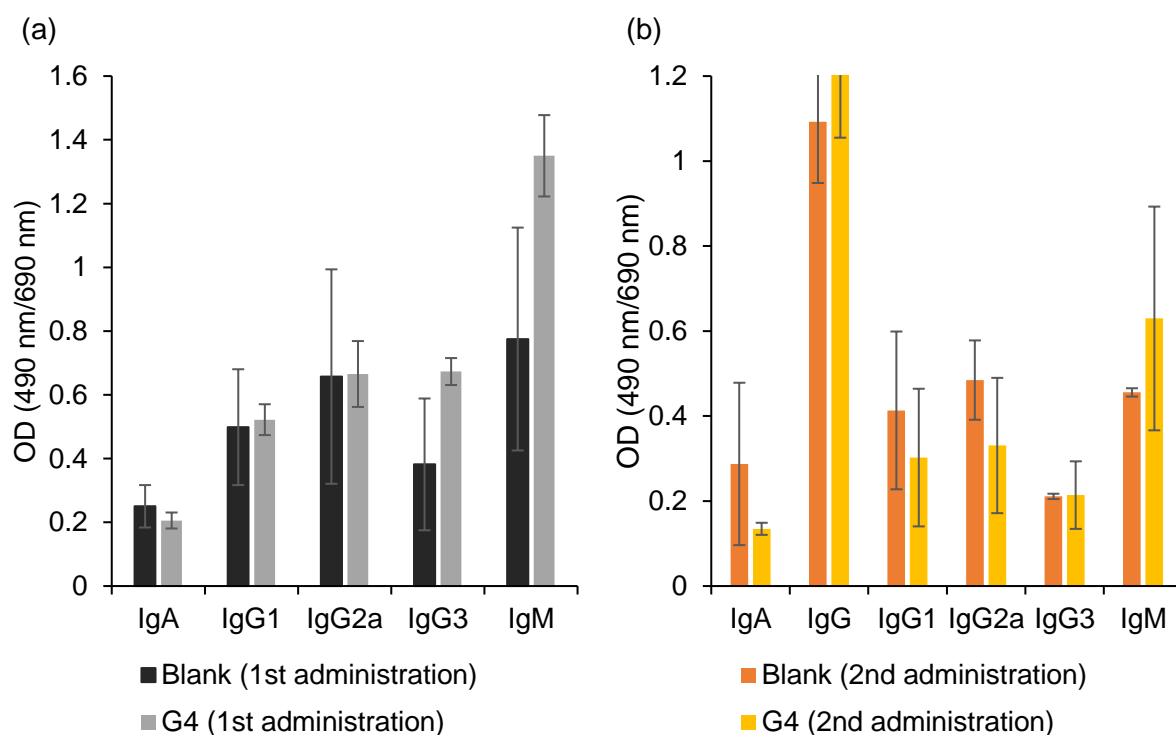

**Fig. S9** The amounts of IgA, IgG1, IgG2a and IgG3 against LY antigen determined by ELISA of the sera of G4 at (a) day 7 and (b) day 14. ELISA was carried out on the LY-L plate. Significant difference between blank and G4 in any antibody type was not detected. ■: the sera prepared from blank group after 1st administration, ▒: the sera prepared from G4 after 1st administration, ■: the sera prepared

from blank group after 2nd administration, ■: the sera prepared from G4 after 2nd administration.

## NMR and MALDI-MS spectrum

### Butanoic acid, 4-[[2-hydroxy-1-hydroxymethylethyl]amino]-4-oxo-tert-butyl ester (3)

a)

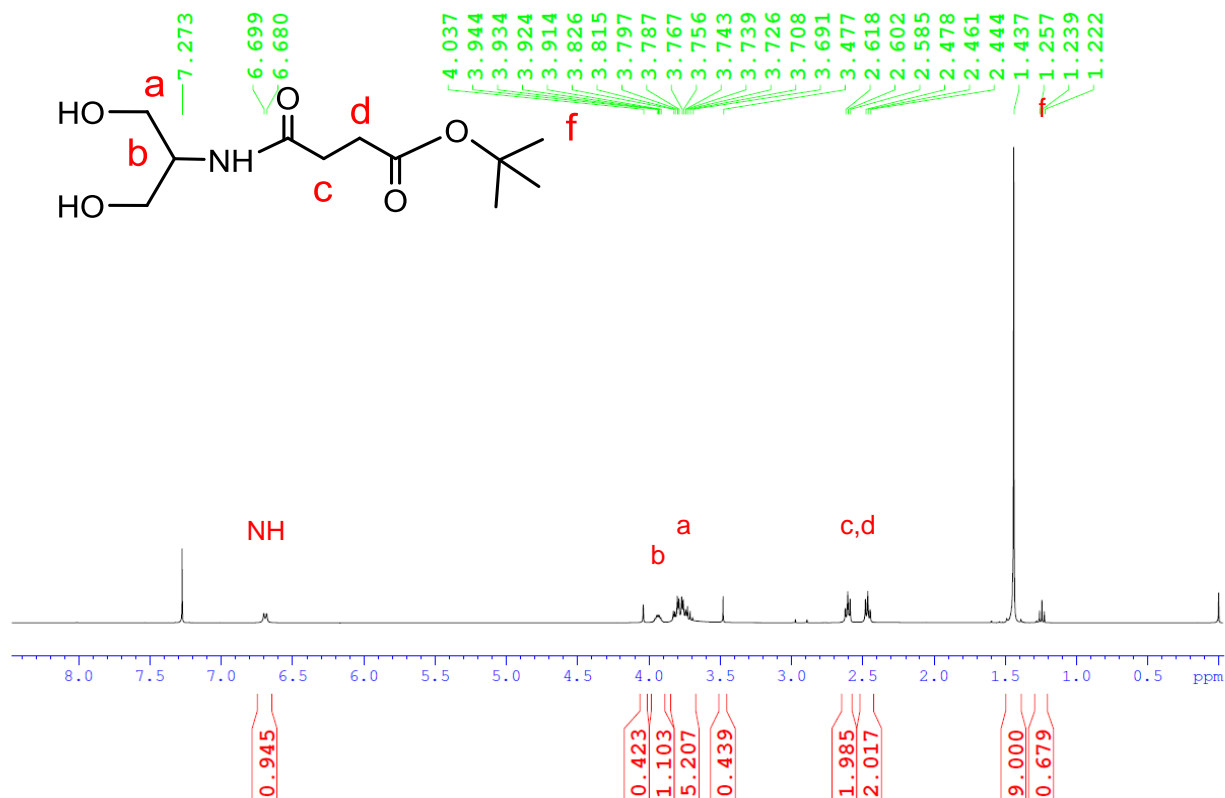

b)

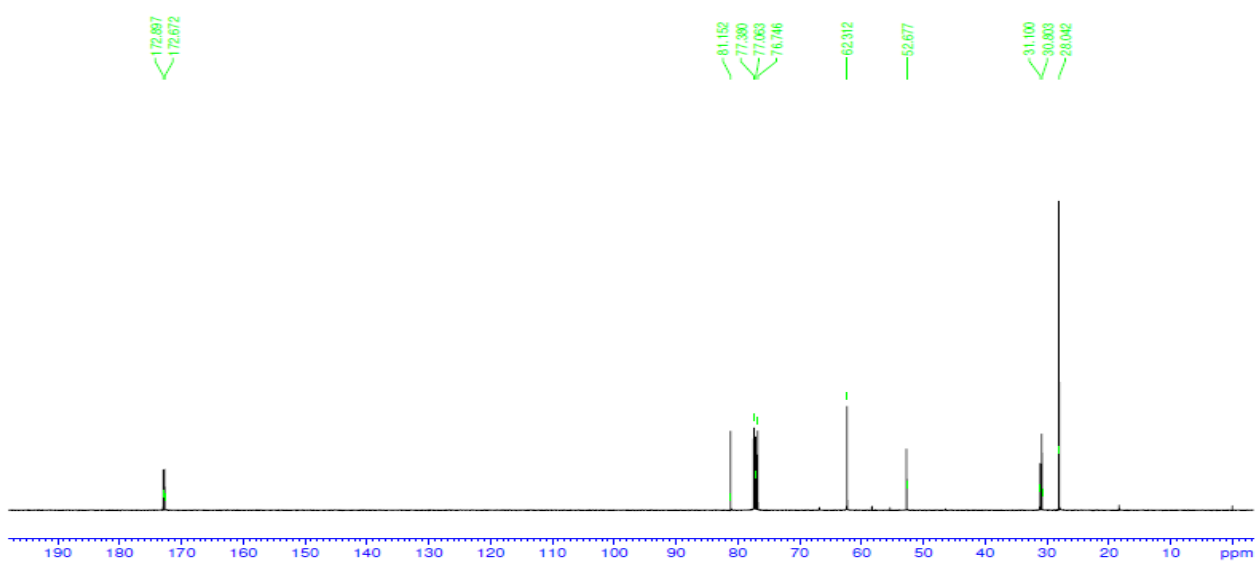

**Figure S10.** a) <sup>1</sup>H NMR and b) <sup>13</sup>C NMR spectrum of **3** in CDCl<sub>3</sub>.

# Compound 5

a)

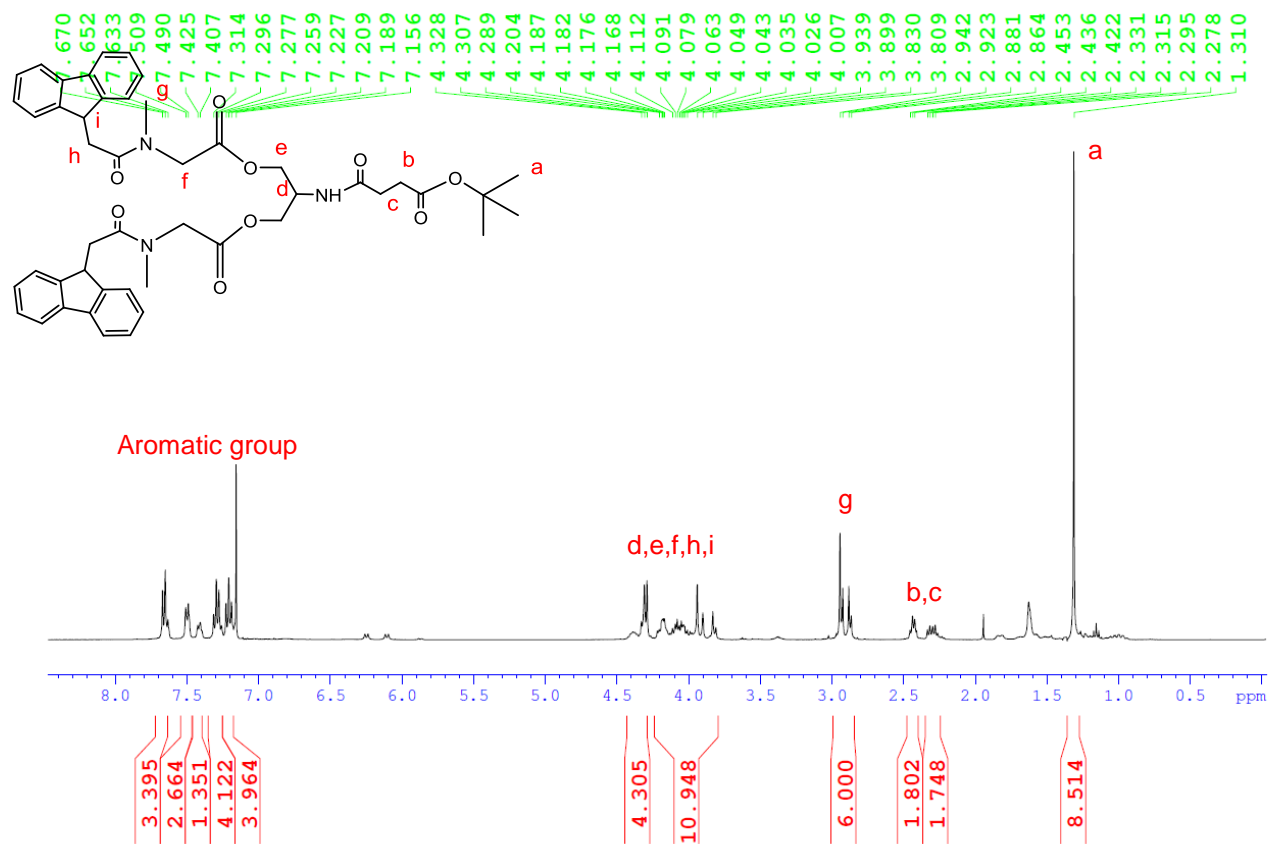

b)

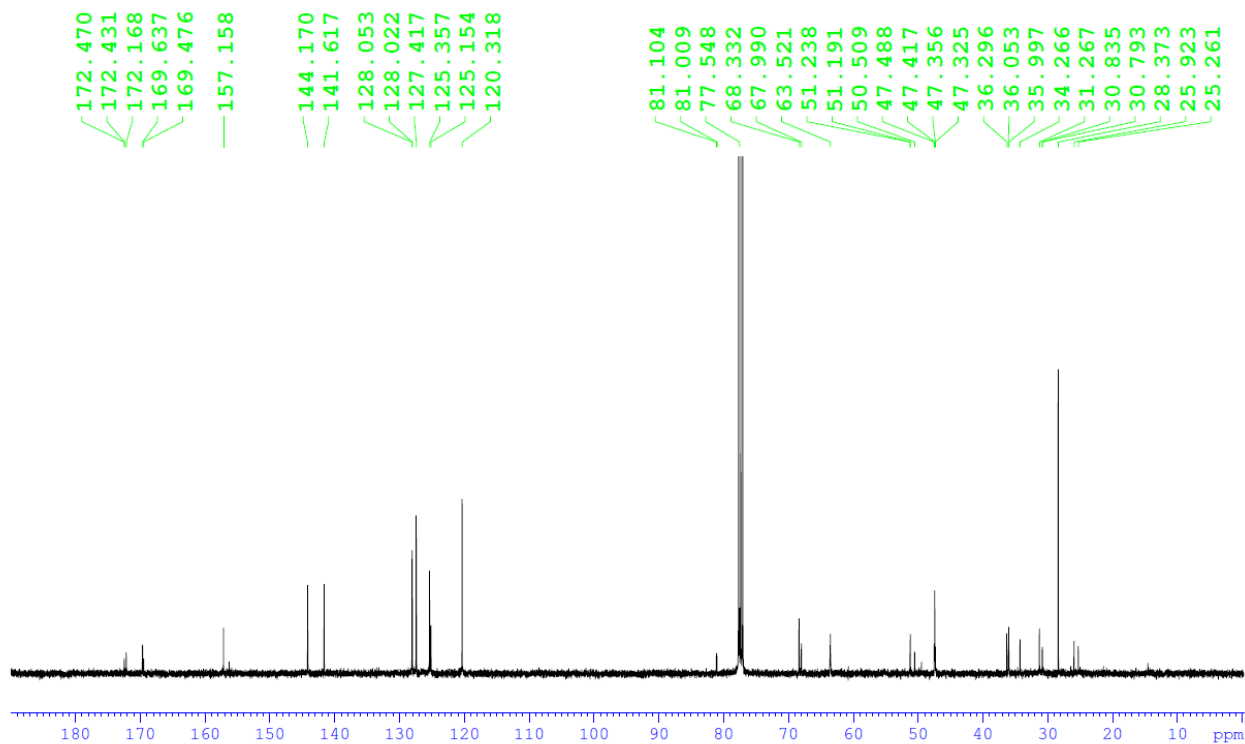

**Figure S11.** a)  $^1\text{H}$  NMR and b)  $^{13}\text{C}$  NMR spectrum of **5** in  $\text{CDCl}_3$ .

## Compound 6

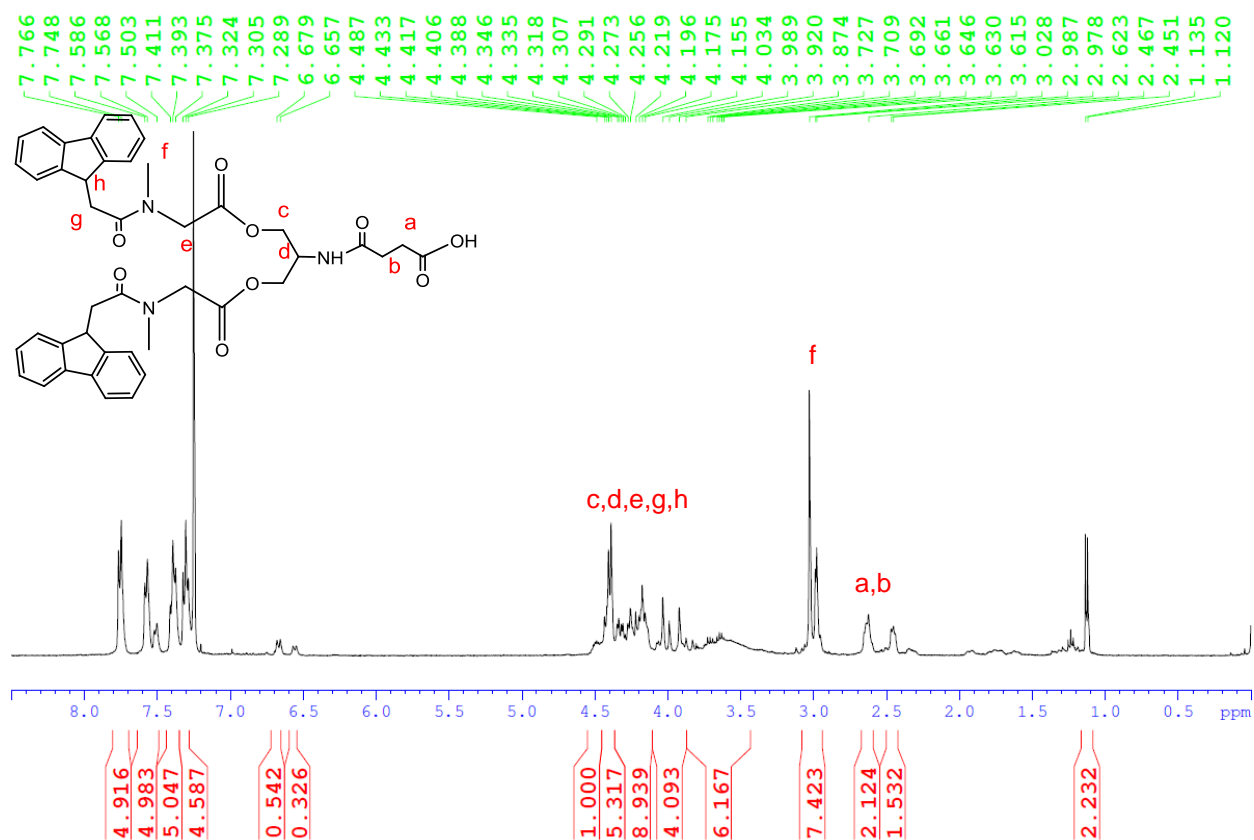

Figure S12. <sup>1</sup>H NMR spectra of **6** in CDCl<sub>3</sub>.

# Compound 9

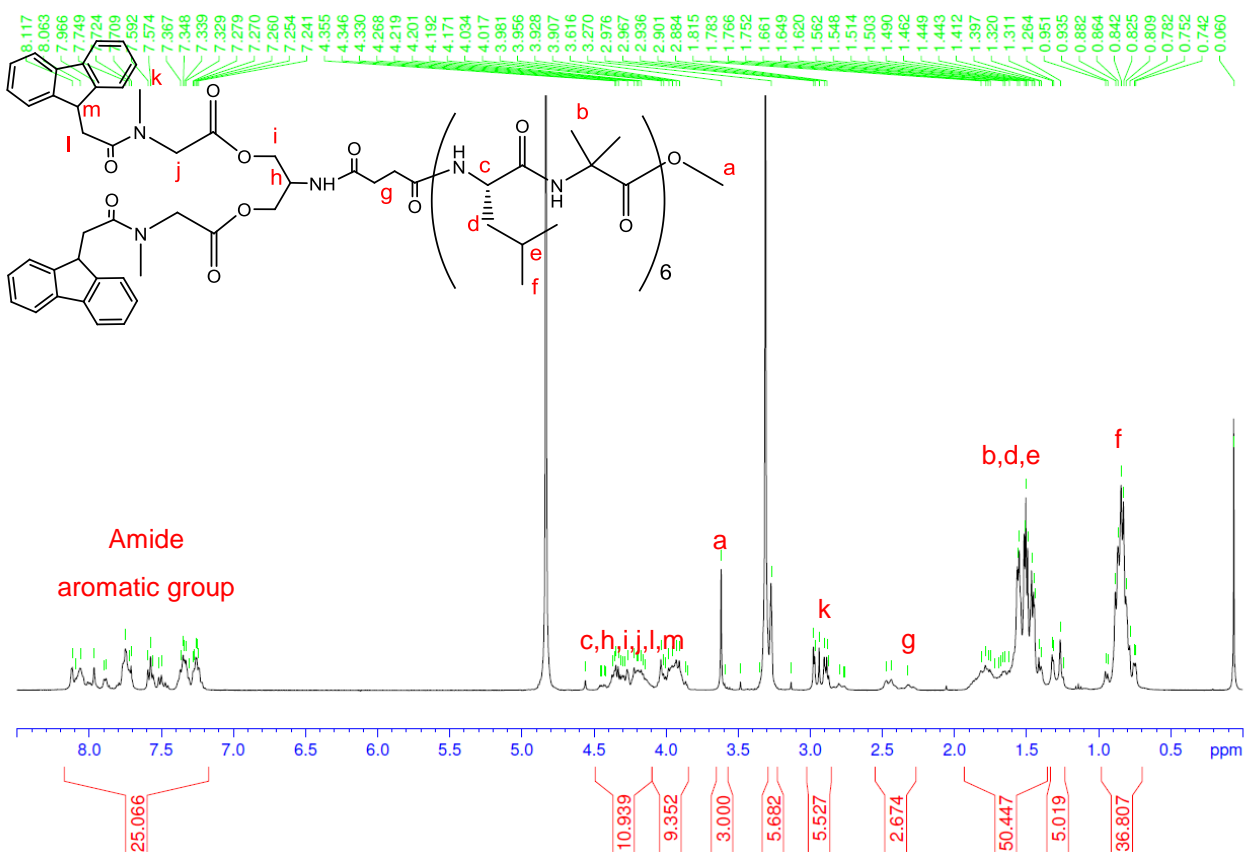

Figure S13. <sup>1</sup>H NMR spectra of 9 in MeOH-d<sub>4</sub>.



### Compound 10

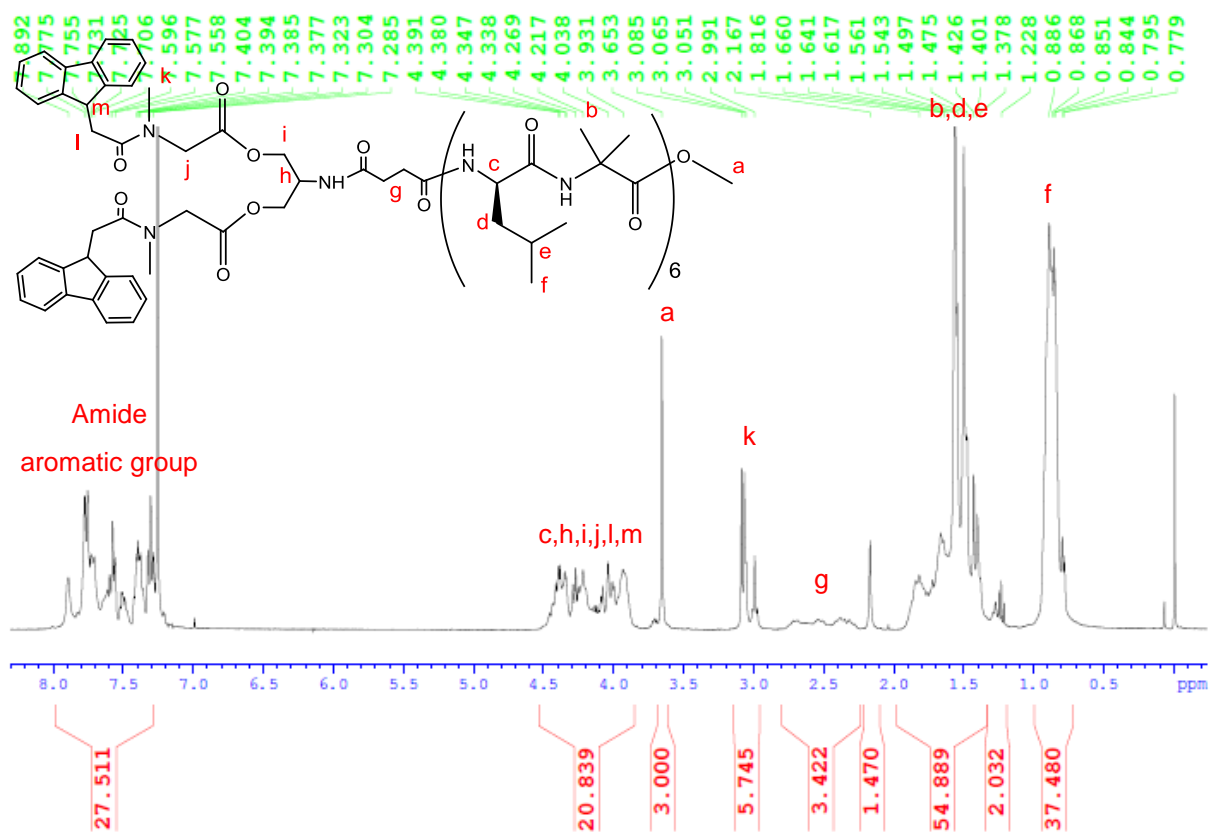

Figure S14. <sup>1</sup>H NMR spectra of **10** in CDCl<sub>3</sub>.

# Compound 11

a)

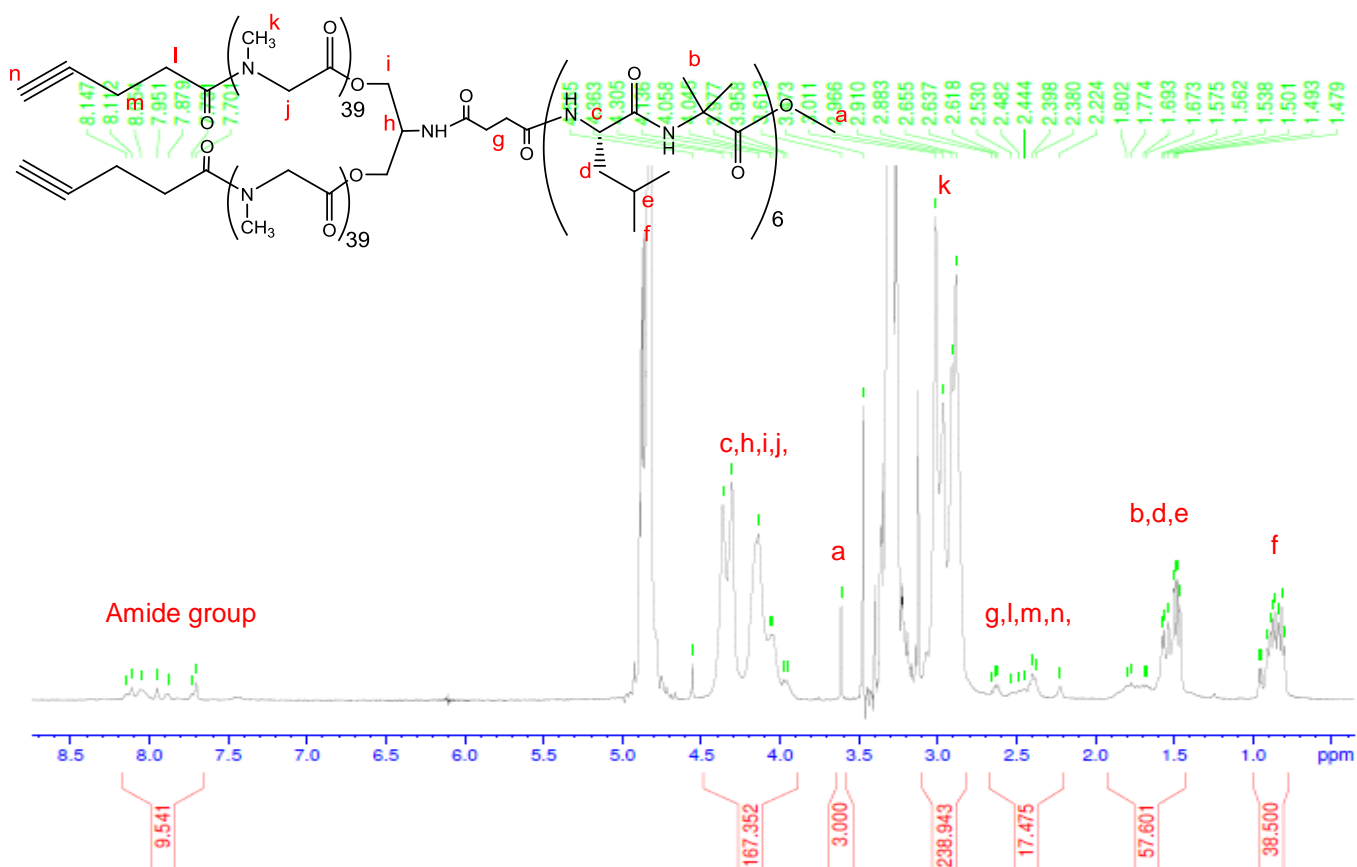

b)

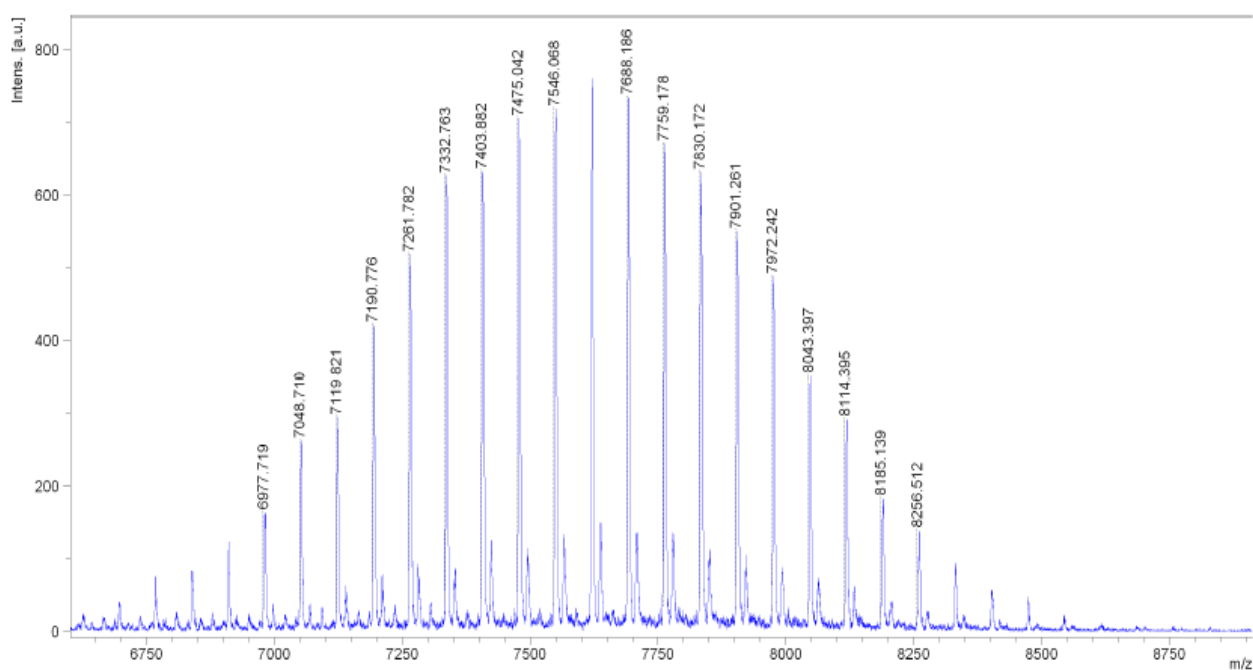

**Figure S15.** a)  $^1\text{H}$  NMR spectra in  $\text{MeOH-d}_4$  and b) MALDI-TOF-MS spectra of **11**.

# Compound 12

a)

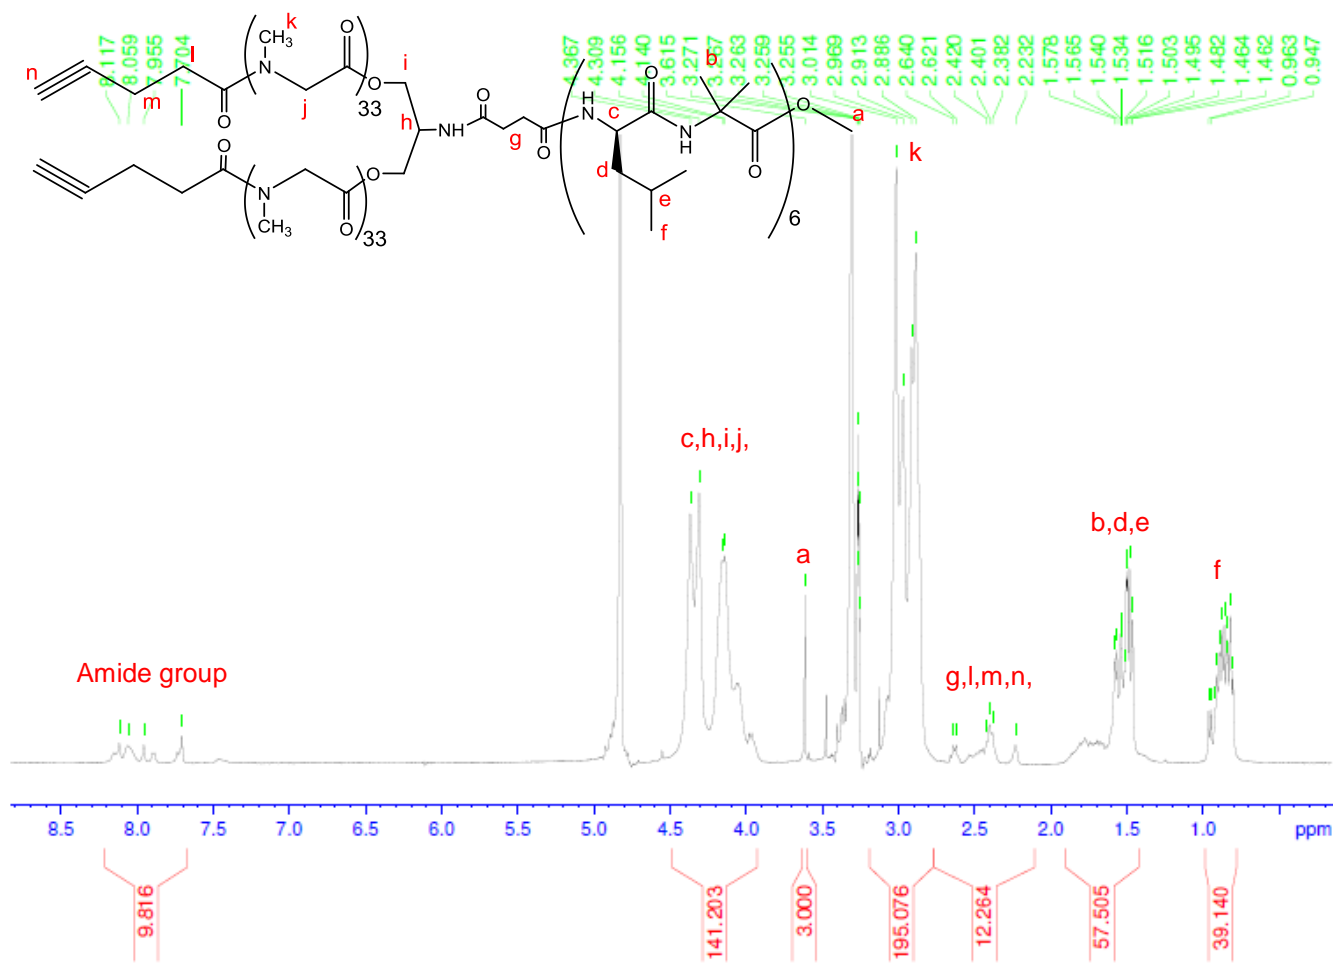

b)

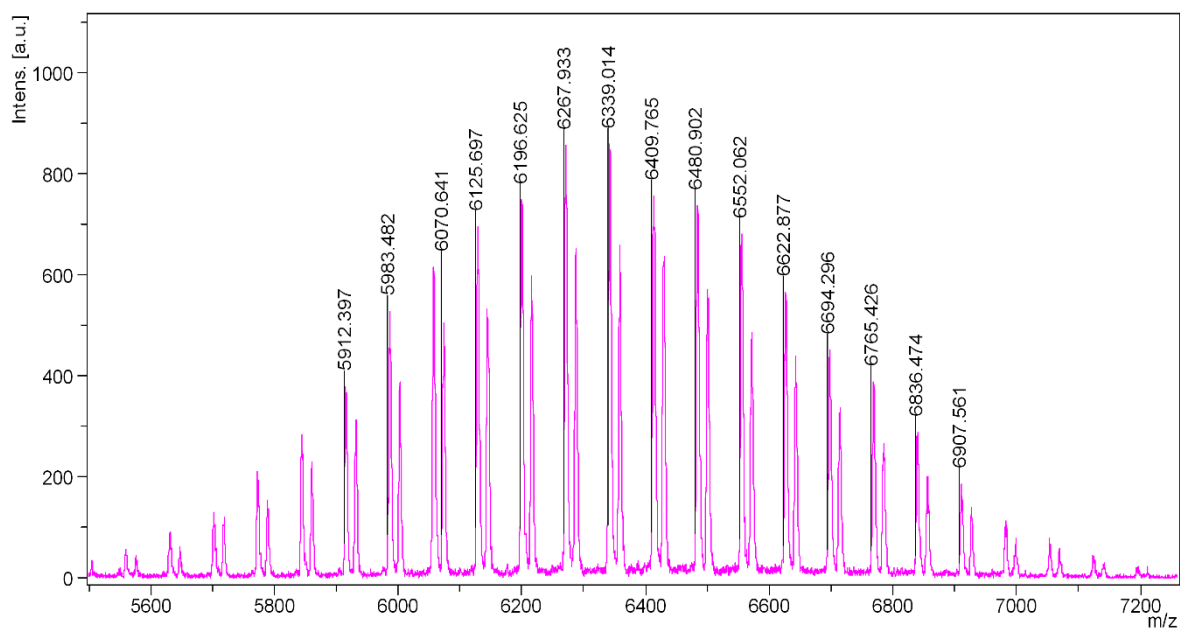

**Figure S16.** a) <sup>1</sup>H NMR spectra in MeOH-d<sub>4</sub> and b) MALDI-TOF-MS spectra of **12**.

**Alkyne-functionalized PSar30-(D-LeuAib)6-OMe (Alkyne-functionalized AB type amphiphile)**

a)

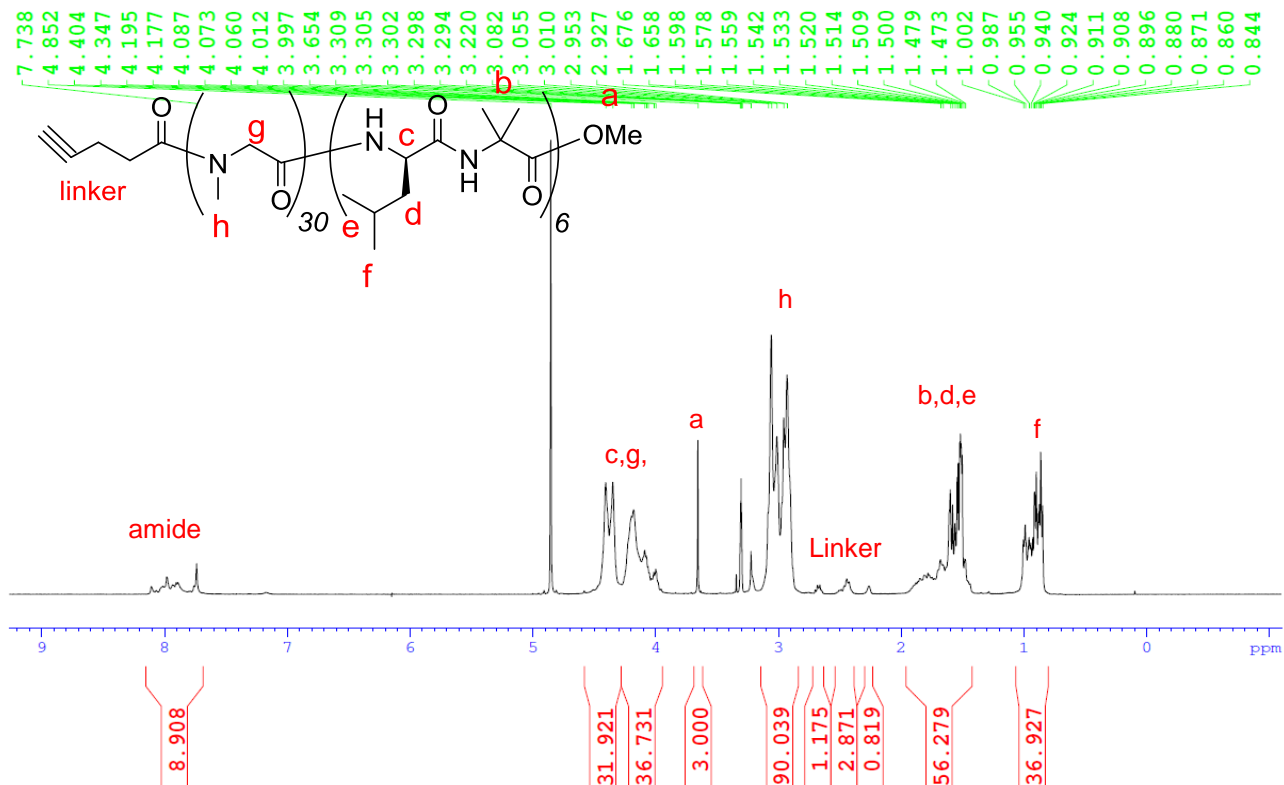

b)

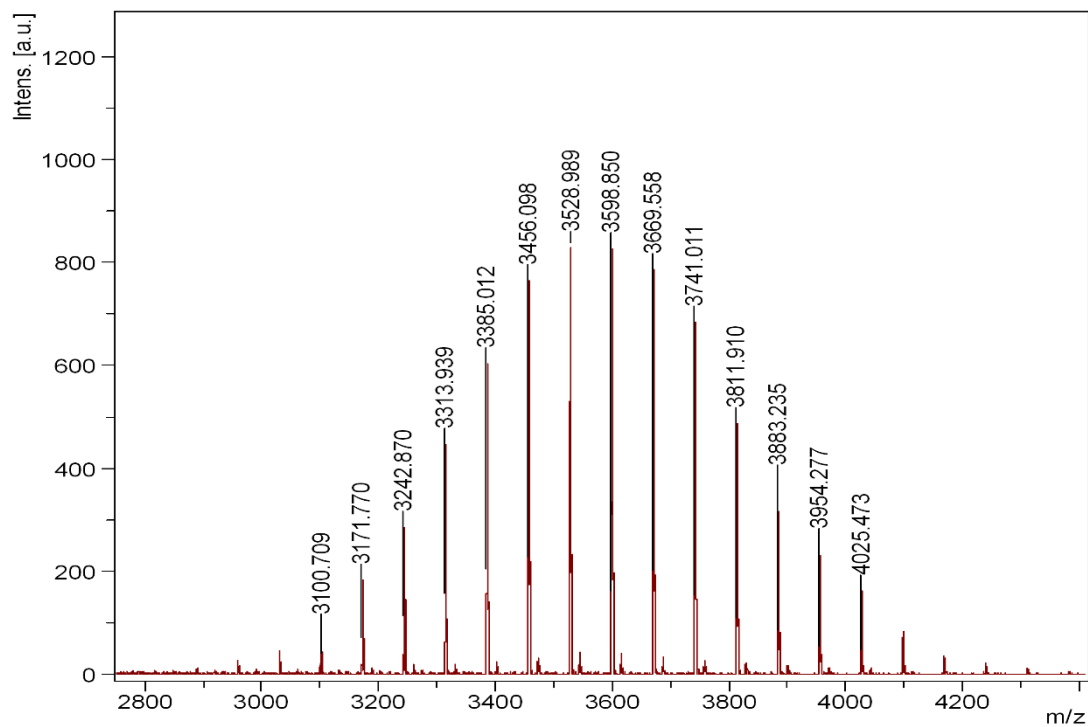

**Figure S17.** a)  $^1\text{H}$  NMR spectra in MeOH- $d_4$  and b) MALDI-TOF-MS spectra of Alkyne capping PSar30-(D-LeuAib) $_6$ -OMe.

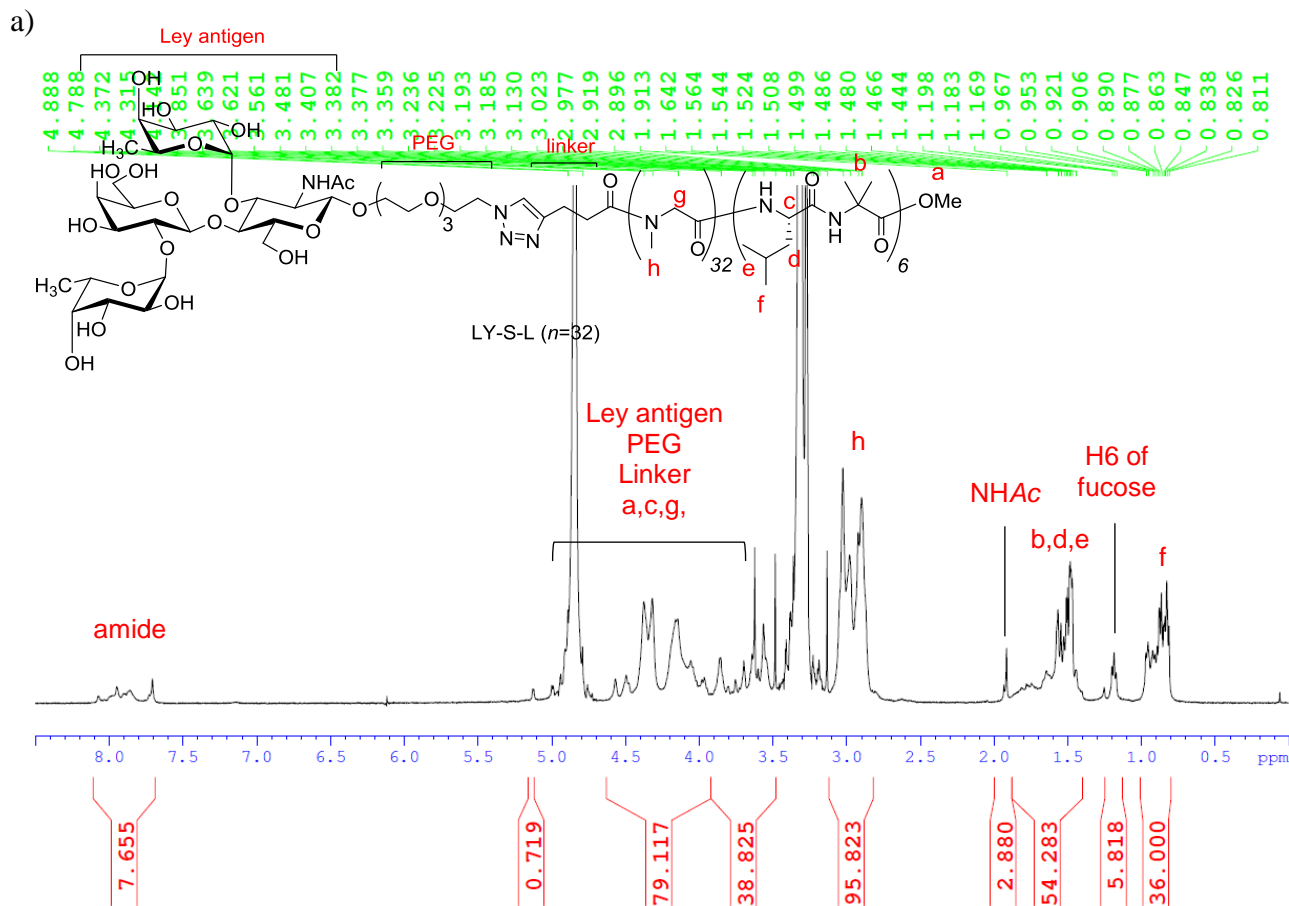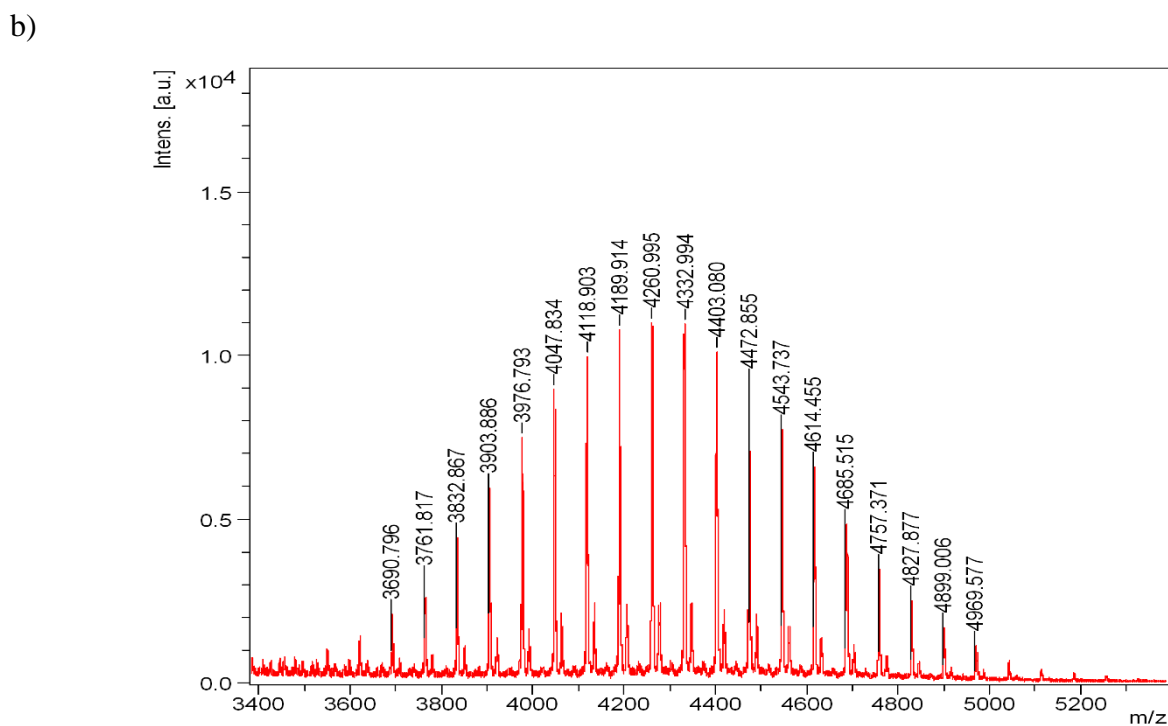

**Figure S18.** a)  $^1\text{H}$  NMR spectra in MeOH- $d_4$  and b) MALDI-TOF-MS spectra of LY-S-L.

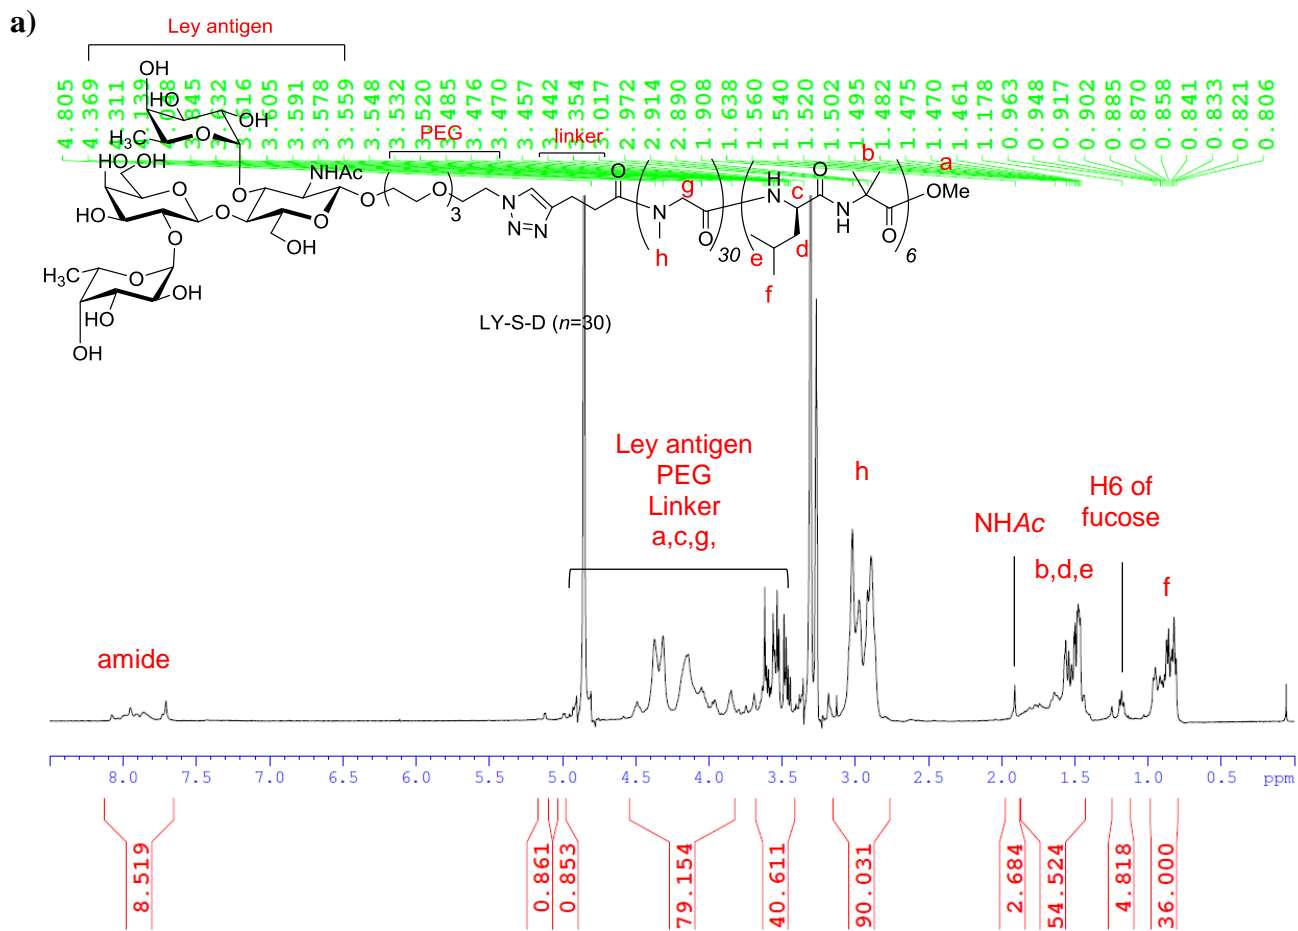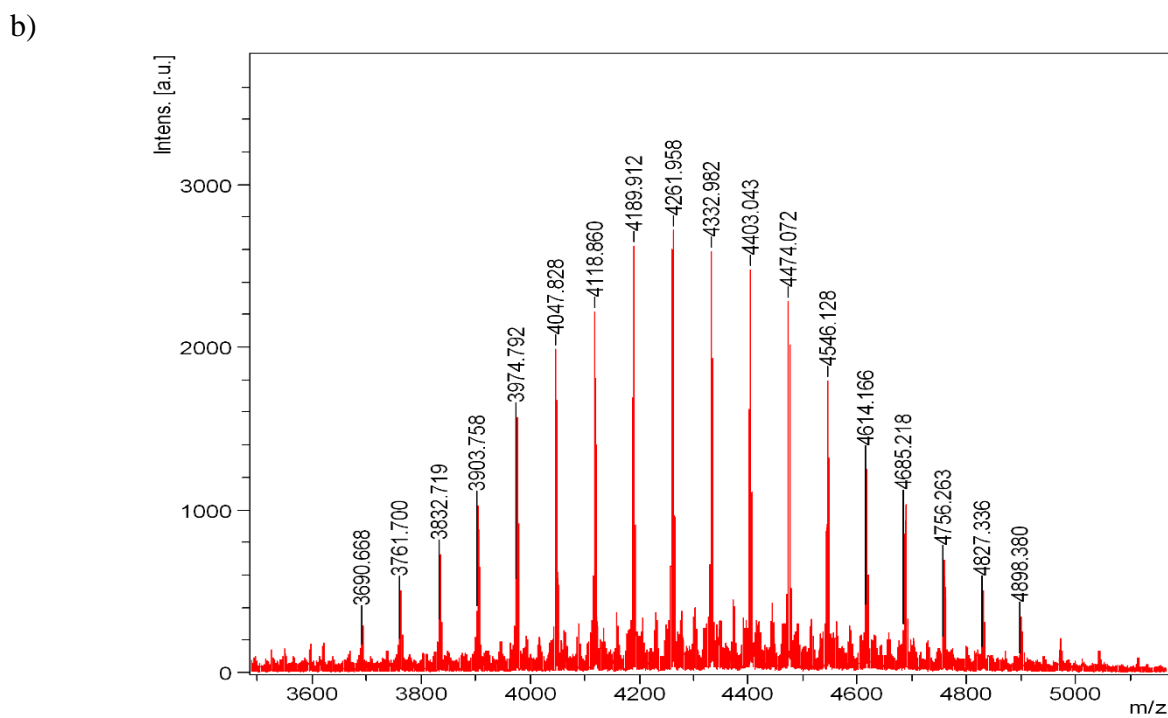

**Figure S19.** a)  $^1\text{H}$  NMR spectra in MeOH- $d_4$  and b) MALDI-TOF-MS spectra of LY-S-D.
